# Supplementary material
Source: MDPI journal article supplement (https://www.mdpi.com/2073-4344/12/12/1507)
Supplement: s1 [file s1]

## Supplementary Materials

# Characterization and Syngas Production at Low Temperature via Dry Reforming of Methane over Ni-M (M = Fe, Cr) Catalysts Tailored from LDH Structure

Manel Hallassi <sup>1,2,3</sup>, Rafik Benrabaa <sup>2,3</sup>, Nawal Fodil Cherif <sup>4</sup>, Djahida Lerari <sup>4</sup>, Redouane Chebout <sup>4</sup>, Khaldoun Bachari <sup>4</sup>, Annick Rubbens <sup>5</sup>, Pascal Roussel <sup>5</sup>, Rose-Noëlle Vannier <sup>5</sup>, Martine Trentesaux <sup>5</sup> and Axel Lôfberg <sup>5,\*</sup>

<sup>1</sup> Université 20 Août-Skikda, Faculté de Technologie, Département de Génie des Procédés, BP 26, route Al-Hadaiek, 21000 Skikda, Algérie

<sup>2</sup> Laboratoire de Physico-Chimie des Matériaux, Faculté des Sciences et de la Technologie, Université Chadli Bendjedid-El Tarf B.P 73, El Tarf 36000, Algérie

<sup>3</sup> Laboratoire de Matériaux Catalytiques et Catalyse en Chimie Organique, Faculté de Chimie, USTHB, BP 32, El-Alia, 16111 Bab Ezzouar, Alger, Algérie

<sup>4</sup> Centre de Recherche Scientifique et Technique en Analyses Physico-Chimiques, BP 384, Siège ex-Pasna Zone Industrielle, Bou-Ismaïl CP 42004, Tipaza, Algérie

<sup>5</sup> Univ. Lille, CNRS, Centrale Lille, ENSCL, Univ. Artois, UMR 8181 - UCCS - Unité de Catalyse et Chimie du Solide, F-59000 Lille, France

\* Correspondence: axel.lofberg@univ-lille.fr; Tel.: +33-03-20-43-45-27

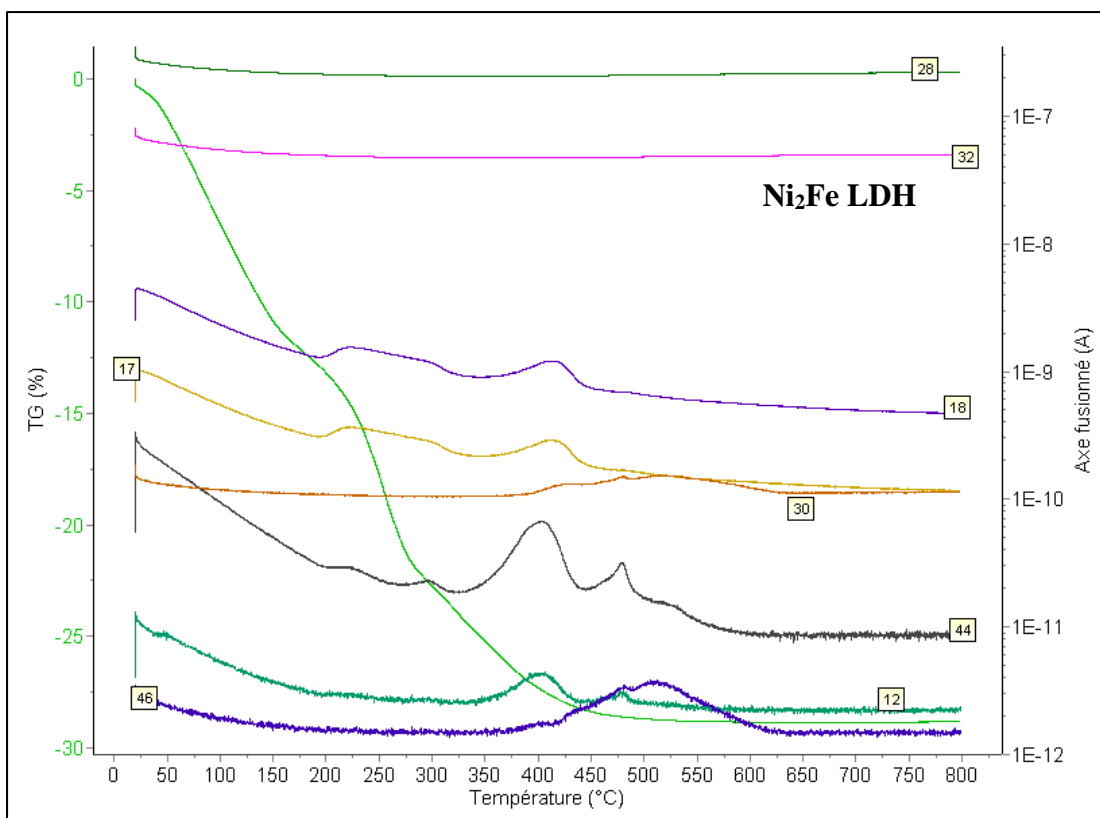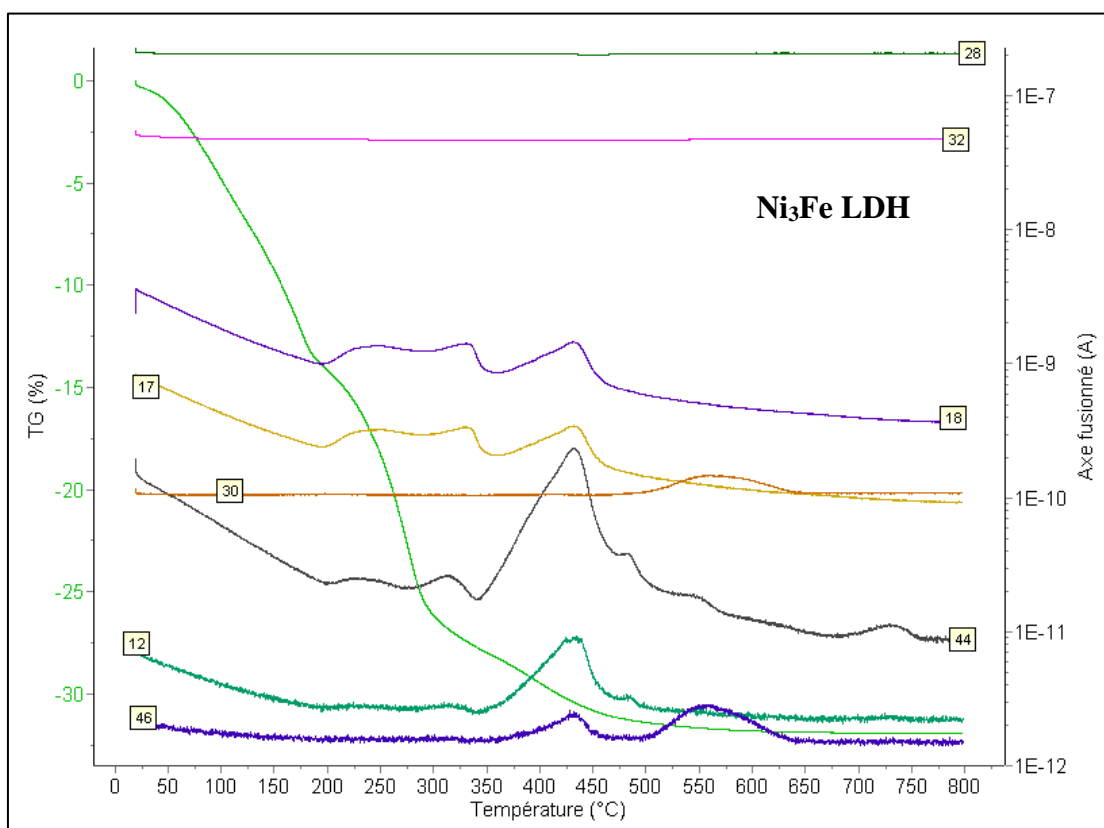

**Figure S1.** TG-MS curves of Ni<sub>2</sub>Fe and Ni<sub>3</sub>Fe LDH precursors performed in air atmosphere.

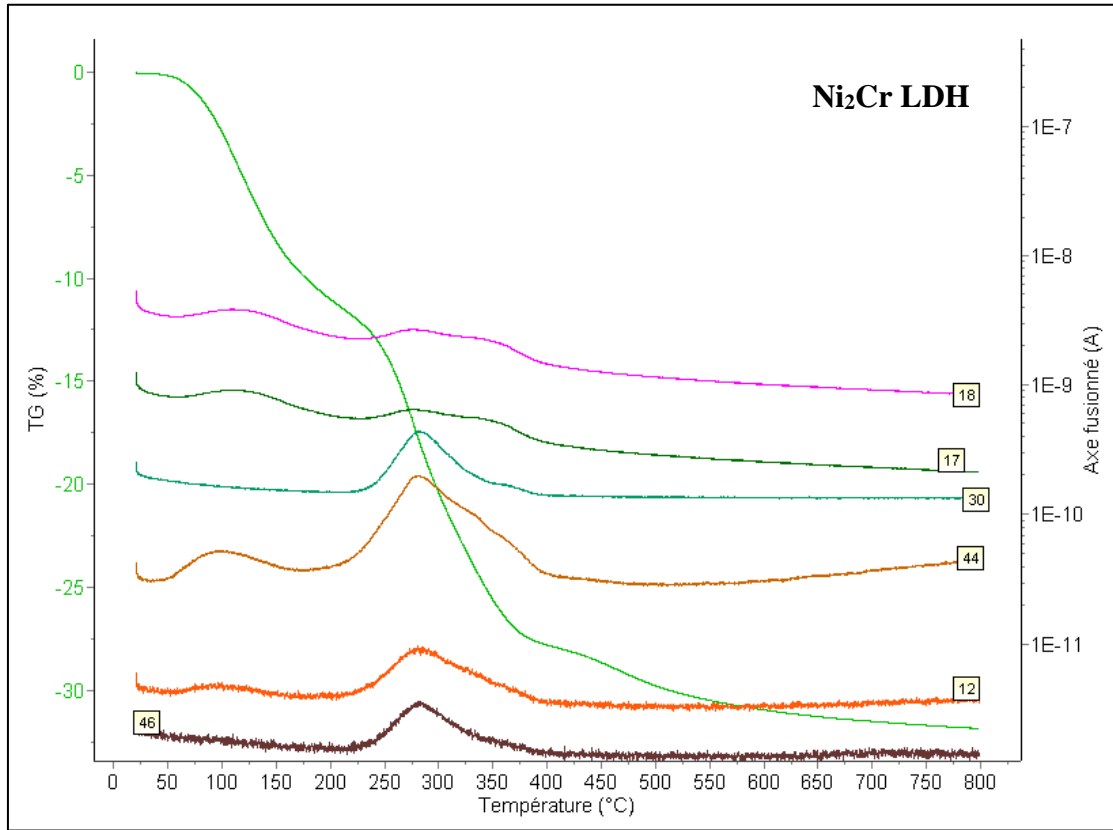

Figure S2. TG-MS curves of  $\text{Ni}_2\text{Cr LDH}$  precursor performed in air atmosphere.

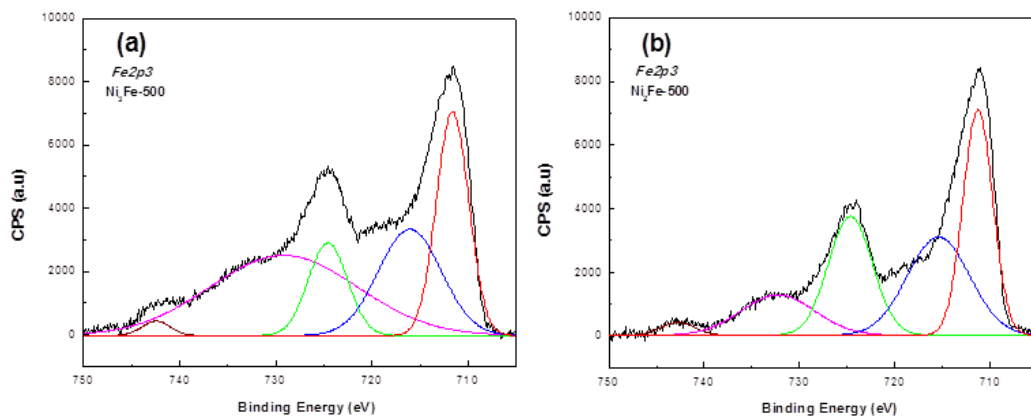

**Figure S3.** XPS spectra of  $Fe2p_{3/2}$  species of (a)  $Ni_3Fe-500$  and (b)  $Ni_2Fe-500$ .

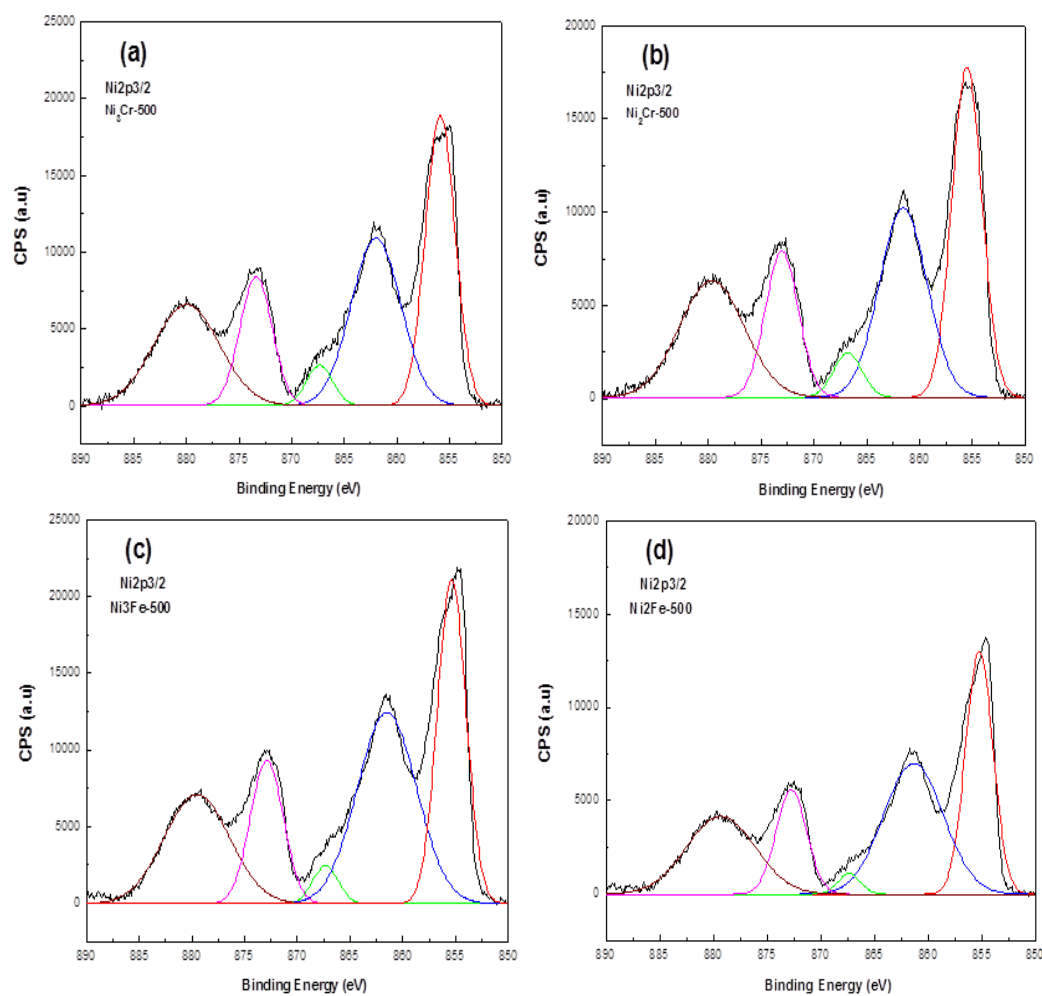

**Figure S4.** XPS spectra of  $Ni2p_{3/2}$  species of (a)  $Ni_3Cr-500$ , (b)  $Ni_2Cr-500$ , (c)  $Ni_3Fe-500$  and (d)  $Ni_2Fe-500$ .

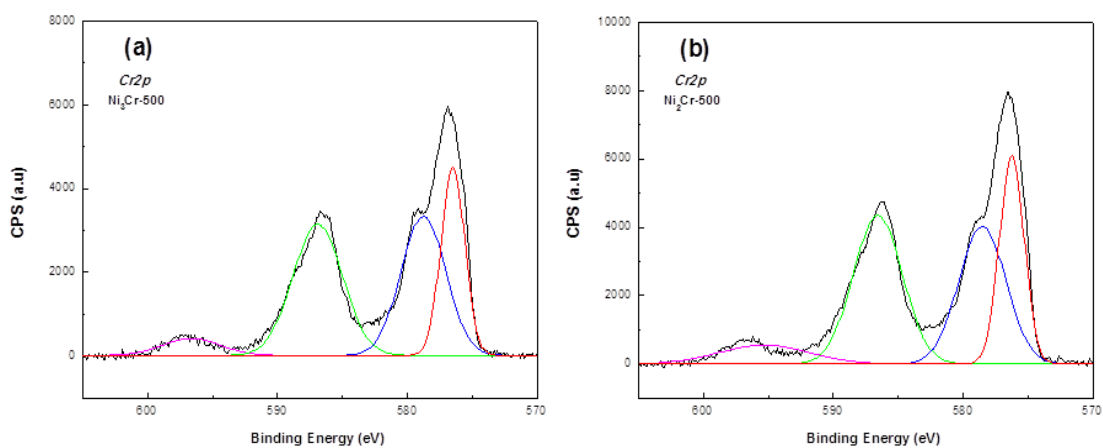

**Figure S5.** XPS spectra of Cr2p species of (a) Ni<sub>3</sub>Cr-500 and (b) Ni<sub>2</sub>Cr-500.

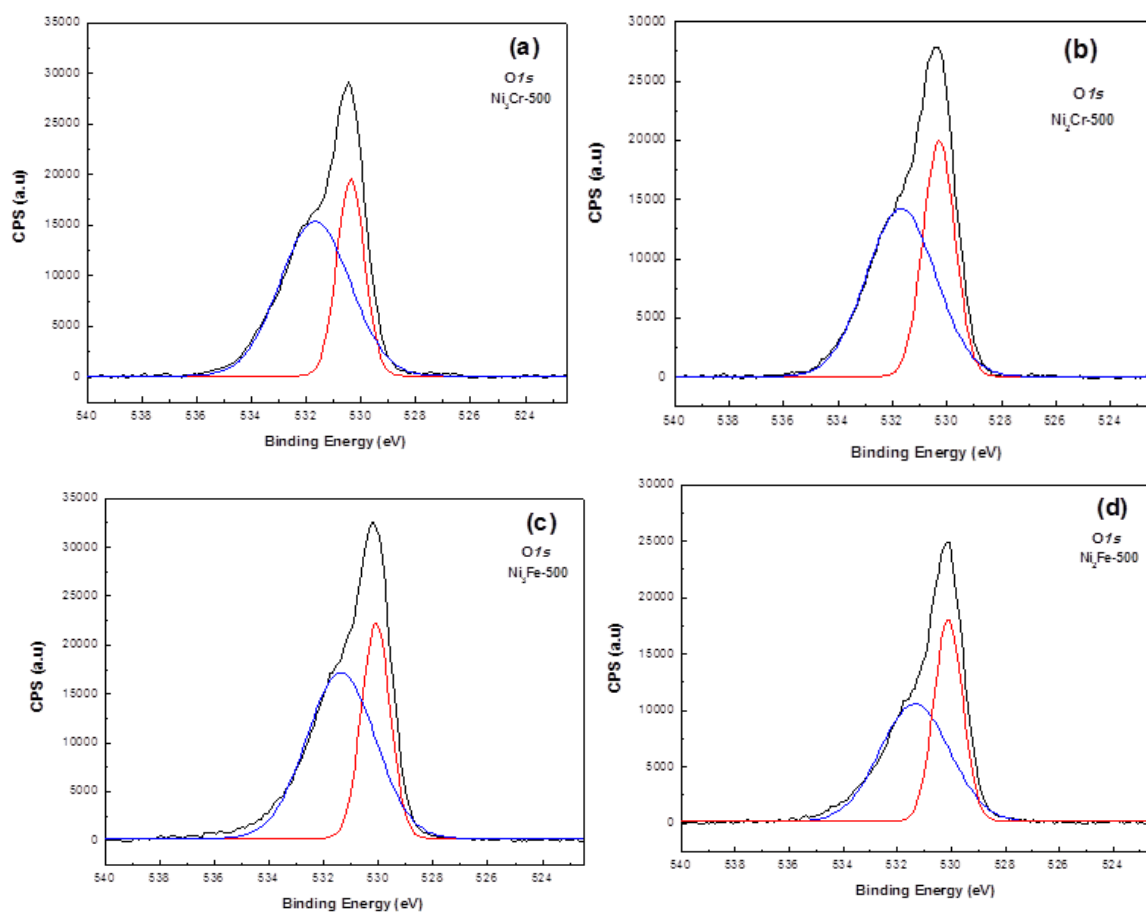

**Figure S6.** XPS spectra of O1s species of (a) Ni<sub>3</sub>Cr-500, (b) Ni<sub>2</sub>Cr-500, (c) Ni<sub>3</sub>Fe-500 and (d) Ni<sub>2</sub>Fe-500.

**Table S1.** TGA-MS of Ni<sub>R</sub>Fe and Ni<sub>R</sub>Cr LDH precursors.

| <b>LDH</b>                                                                                            | <b>Domain of T° (°C)</b> | <b>Species released</b>                                                    | <b>% of lost mass</b> | <b>% total lost mass</b> | <b>% total theoretical lost mass</b> |
|-------------------------------------------------------------------------------------------------------|--------------------------|----------------------------------------------------------------------------|-----------------------|--------------------------|--------------------------------------|
| R=2<br>[Ni <sub>0.66</sub> Fe <sub>0.33</sub> (OH) <sub>2</sub> ] (CO <sub>3</sub> ) <sub>0.165</sub> | 30 -150                  | H <sub>2</sub> O                                                           | 6.02                  | 24,01                    | 24,99                                |
|                                                                                                       | 150-281                  | H <sub>2</sub> O,NO,                                                       | 10.97                 |                          |                                      |
|                                                                                                       | 281 -474                 | CO <sub>2</sub> , NO <sub>2</sub><br>NO,CO <sub>2</sub><br>NO <sub>2</sub> | 7.02                  |                          |                                      |
| R=3<br>[Ni <sub>0.75</sub> Fe <sub>0.25</sub> (OH) <sub>2</sub> ] (CO <sub>3</sub> ) <sub>0.125</sub> | 30 -16                   | H <sub>2</sub> O                                                           | 9,25                  | 27,44                    | 23,34                                |
|                                                                                                       | 164-290                  | H <sub>2</sub> O,NO,                                                       | 12,75                 |                          |                                      |
|                                                                                                       | 290 -480                 | CO <sub>2</sub> NO <sub>2</sub><br>NO,CO <sub>2</sub><br>NO <sub>2</sub>   | 5,44                  |                          |                                      |
| R=2<br>[Ni <sub>0.66</sub> Cr <sub>0.33</sub> (OH) <sub>2</sub> ] (CO <sub>3</sub> ) <sub>0.165</sub> | 53-156                   | H <sub>2</sub> O                                                           | 9,37                  | 31,73                    | 25,3                                 |
|                                                                                                       | 156-345                  | H <sub>2</sub> O,NO,                                                       | 18,62                 |                          |                                      |
|                                                                                                       | 345 -570                 | CO <sub>2</sub> NO <sub>2</sub><br>NO,CO <sub>2</sub><br>NO <sub>2</sub>   | 3,74                  |                          |                                      |
| R=3<br>[Ni <sub>0.75</sub> Cr <sub>0.25</sub> (OH) <sub>2</sub> ] (CO <sub>3</sub> ) <sub>0.125</sub> | 51 -159                  | H <sub>2</sub> O                                                           | 9,17                  | 31,53                    | 23,85                                |
|                                                                                                       | 159-352                  | H <sub>2</sub> O,NO,                                                       | 18,62                 |                          |                                      |
|                                                                                                       | 352 -580                 | CO <sub>2</sub> NO <sub>2</sub><br>NO,CO <sub>2</sub><br>NO <sub>2</sub>   | 3,74                  |                          |                                      |

**Table S2.** Catalytic performances in DRM, temperature programmed mode

| <b>Catalysts</b>       | <b>T (°C)</b> | <b>X% CH<sub>4</sub></b> | <b>X% CO<sub>2</sub></b> | <b>S% H<sub>2</sub></b> | <b>H<sub>2</sub>/CO</b> |
|------------------------|---------------|--------------------------|--------------------------|-------------------------|-------------------------|
| Ni <sub>2</sub> Cr-500 | 400           | 0                        | 0                        | 0                       | 0                       |
|                        | 450           | 0                        | 0                        | 0                       | 0                       |
|                        | 500           | 16                       | 18                       | 59                      | 0.6                     |
|                        | 550           | 37                       | 36                       | 75                      | 0.9                     |
|                        | 600           | 63                       | 48                       | 73                      | 1.2                     |
|                        | 650           | 46                       | 28                       | 55                      | 1.3                     |
| Ni <sub>3</sub> Cr-500 | 400           | 1                        | 1                        | 0                       | 0                       |
|                        | 450           | 4                        | 4                        | 36                      | 0.3                     |
|                        | 500           | 23                       | 22                       | 68                      | 0.7                     |
|                        | 550           | 40                       | 29                       | 70                      | 1.1                     |
|                        | 600           | 47                       | 30                       | 52                      | 1.8                     |
|                        | 650           | 70                       | 27                       | 25                      | 0.9                     |
| Ni <sub>2</sub> Fe-500 | 400           | 3                        | 1                        | 2                       | 0                       |
|                        | 450           | 3                        | 1                        | 2                       | 0                       |
|                        | 500           | 4                        | 1                        | 2                       | 0                       |
|                        | 550           | 7                        | 1                        | 2                       | 0                       |
|                        | 600           | 8                        | 1                        | 5                       | 0.4                     |
|                        | 650           | 6                        | 1                        | 8                       | 0.5                     |
| Ni <sub>3</sub> Fe-500 | 400           | 2                        | 1                        | 1                       | 0                       |
|                        | 450           | 2                        | 1                        | 1                       | 0                       |
|                        | 500           | 3                        | 1                        | 1                       | 0.5                     |
|                        | 550           | 3                        | 1                        | 7                       | 0.6                     |
|                        | 600           | 5                        | 1                        | 6                       | 0.7                     |
|                        | 650           | 7                        | 2                        | 4                       | 0.3                     |
